# Supplementary material
Source: PubMed Central journal article supplement (PMC3815896)
Supplement: mbt0005-0753-SD1.pdf [file mbt0005-0753-SD1.pdf]

# Supplementary information

1

2

3 Rapid detection of total and viable *Legionella pneumophila* in  
4 tap water by immunomagnetic separation, double fluorescent  
5 staining and flow cytometry

6 Hans-Anton Keserue<sup>1,2,3</sup>, Andreas Baumgartner<sup>2</sup>, Richard Felleisen<sup>2</sup>, Thomas  
7 Egli<sup>1,3</sup>

8

9 <sup>1</sup> Swiss Federal Institute for Aquatic Science and Technology (Eawag),  
10 Überlandstrasse 133, P.O. Box 611, CH-8600, Dübendorf, Switzerland

11

12 <sup>2</sup> Federal Office of Public Health (FOPH), Schwarzenburgstrasse 165, CH-3003,  
13 Bern, Switzerland

14

15 <sup>3</sup> Institute of Biogeochemistry and Pollutant Dynamics (IBP), ETH Zurich,  
16 Universitätsstrasse 16, 8092 Zurich, Switzerland.

17

18

19 **Running Title: Rapid detection of viable *Legionella* by FCM**

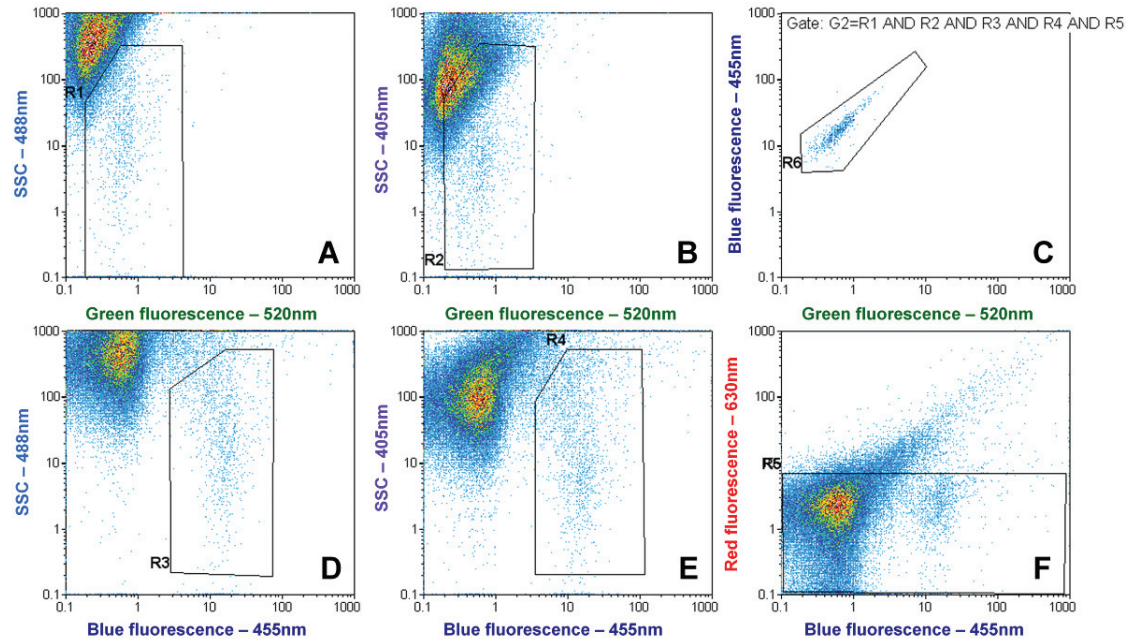

20

21 **Fig. S 1 Example of FCM dot plots for *Lp* spiked to tap water. Complete view**

22 of Fig. 2 Plot A. Gates in plot A, B, D-F are applied to plot C in order to

23 discriminate background signals and membrane-damaged *Lp* cells.

24

25

26

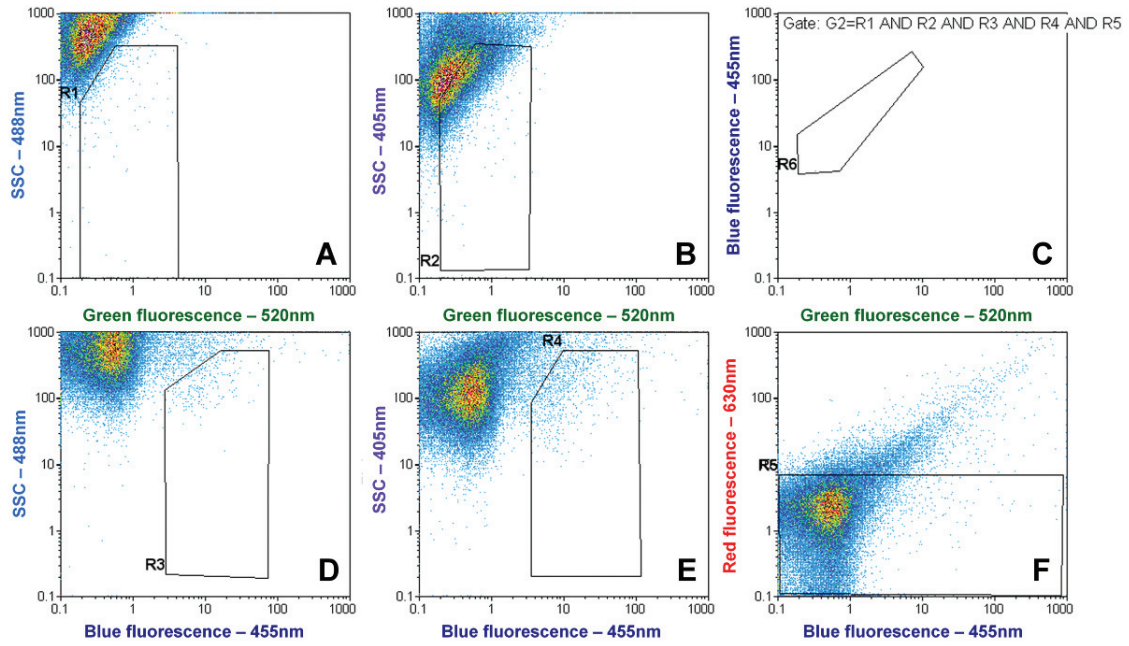

27

28 **Fig. S 2 Example of FCM dot plots for *Lp* spiked to tap water. Complete view**

29 of Fig. 2 Plot B. Gates in plot A, B, D-F are applied to plot C in order to

30 discriminate background signals and membrane-damaged *Lp* cells.

31

32

33

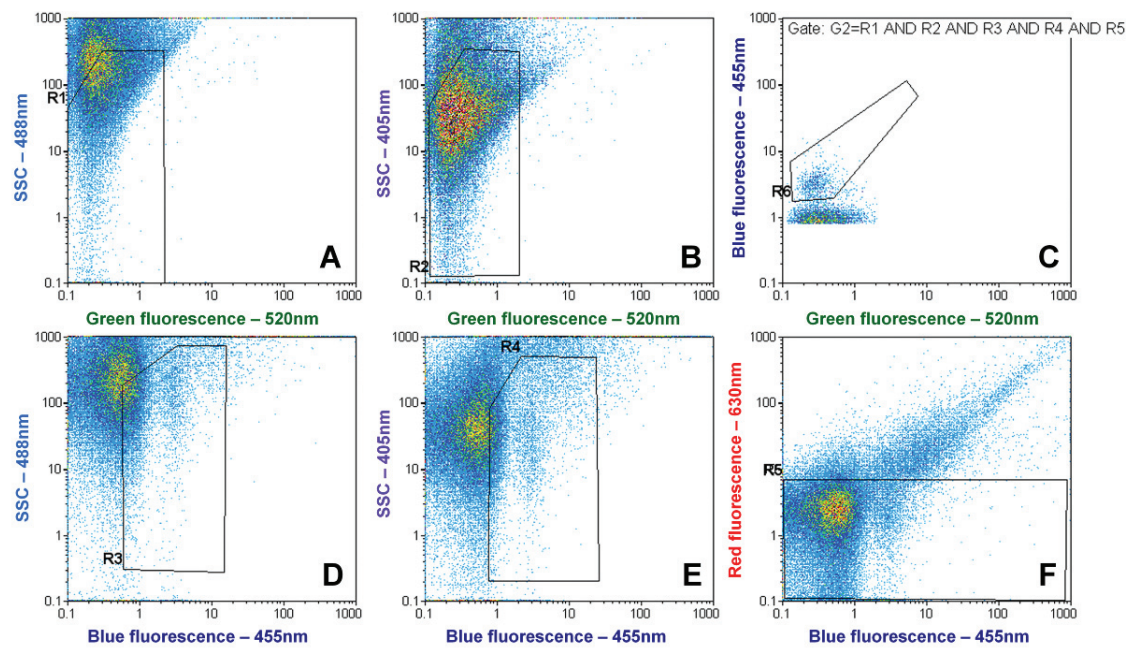

34

35 **Fig. S 3 Example of FCM dot plots for *Lp* spiked to tap water. Complete view**

36 of Fig. 2 Plot D. Gates in plot A, B, D-F are applied to plot C in order to

37 discriminate background signals and membrane-damaged *Lp* cells.

38

39

40

41

42

43

44

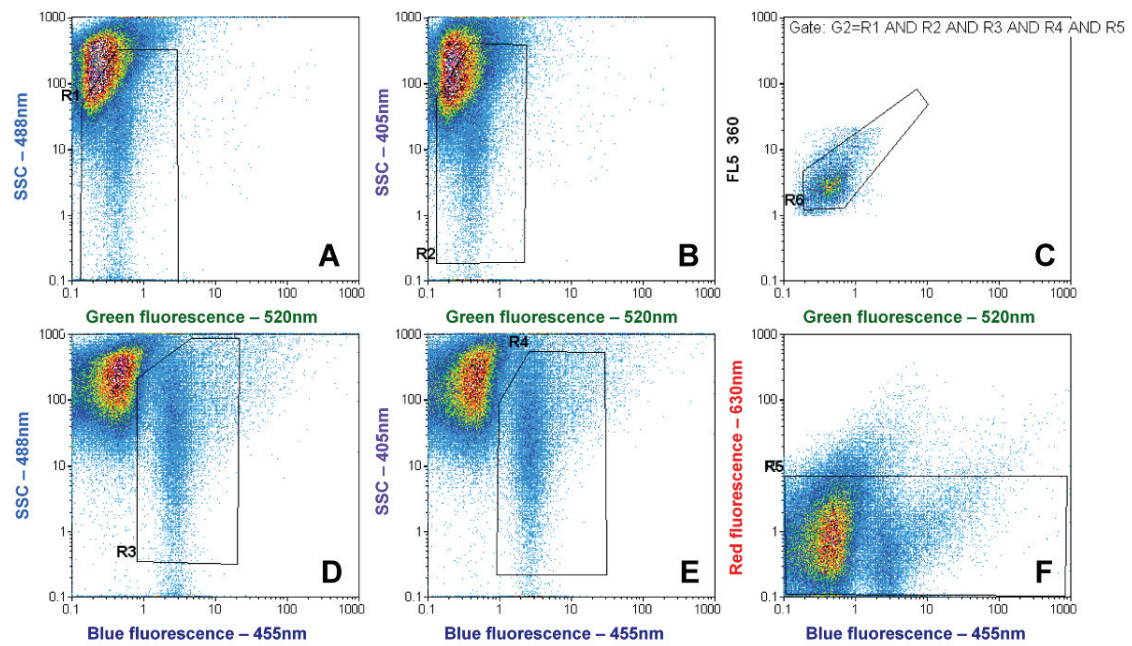

45

46 **Fig. S 4 Example of FCM dot plots for *Lp* spiked to tap water.** Complete view

47 of Fig. 2 Plot E. Gates in plot A, B, D-F are applied to plot C in order to

48 discriminate background signals and membrane-damaged *Lp* cells.

49

50

51

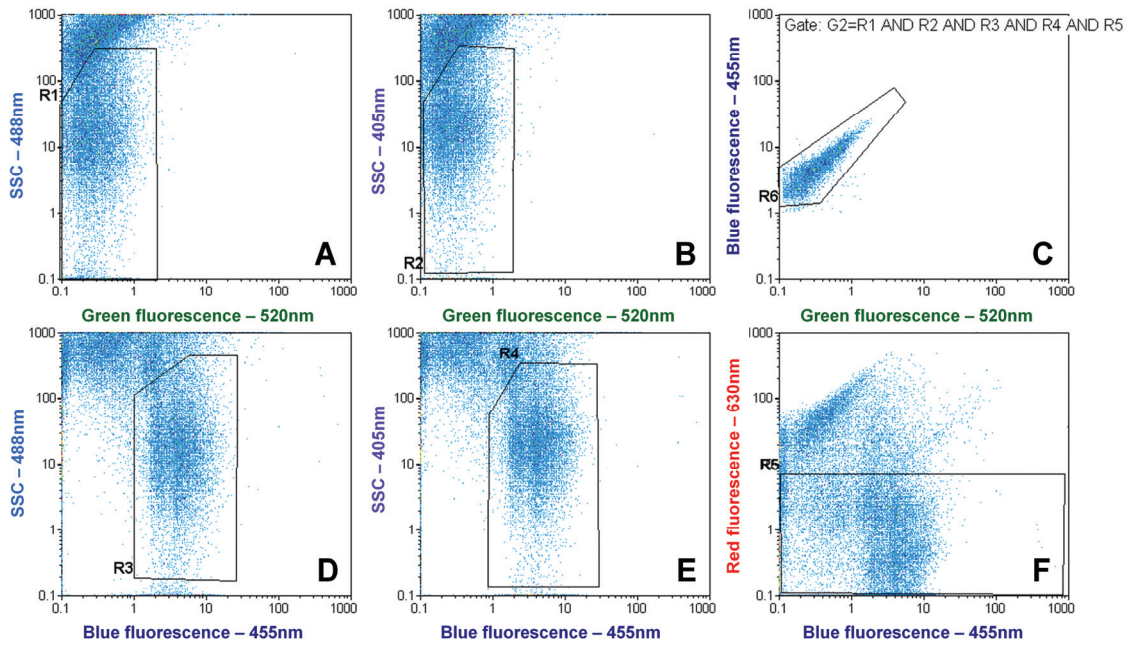

52

53 **Fig. S 5 Example of FCM dot plots for *Lp* spiked to tap water. Complete view**

54 of Fig. 2 Plot F. Gates in plot A, B, D-F are applied to plot C in order to

55 discriminate background signals and membrane-damaged *Lp* cells.

56

57

58

59

60

61

62

63

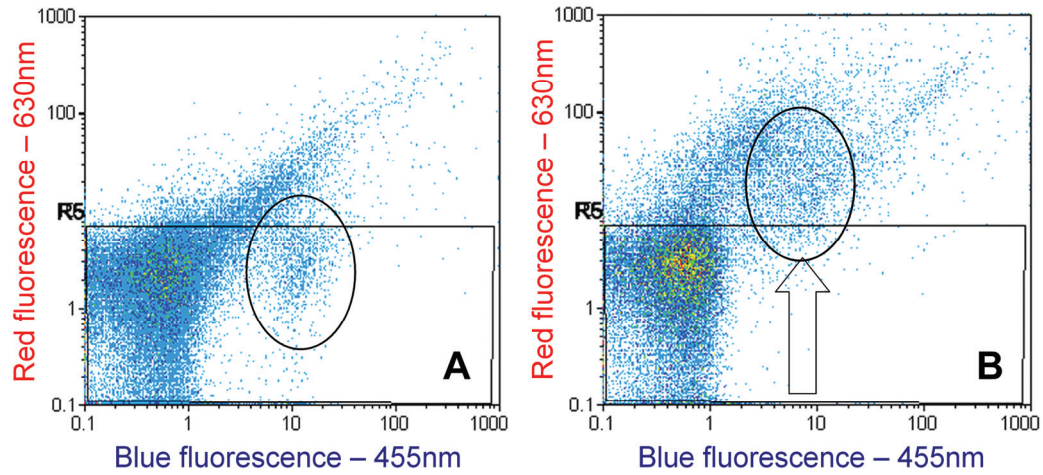

64

65 **Fig. S 6 Example of blue versus red fluorescence dot plot demonstrating**

66 **the increase of red fluorescence in membrane damaged *Lp* cells. Plot A**

67 shows the cells before heat treatment and plot B is after heat treatment of 90° C

68 for one minute. Before heat treatment the *Lp* cells lie inside the gate (A) and after

69 (B) they pass outside the gate and are thus discriminated as membrane-deficient.

70

71

72

**Plating vs. FCM quantification of environmental  
*Legionella pneumophila***

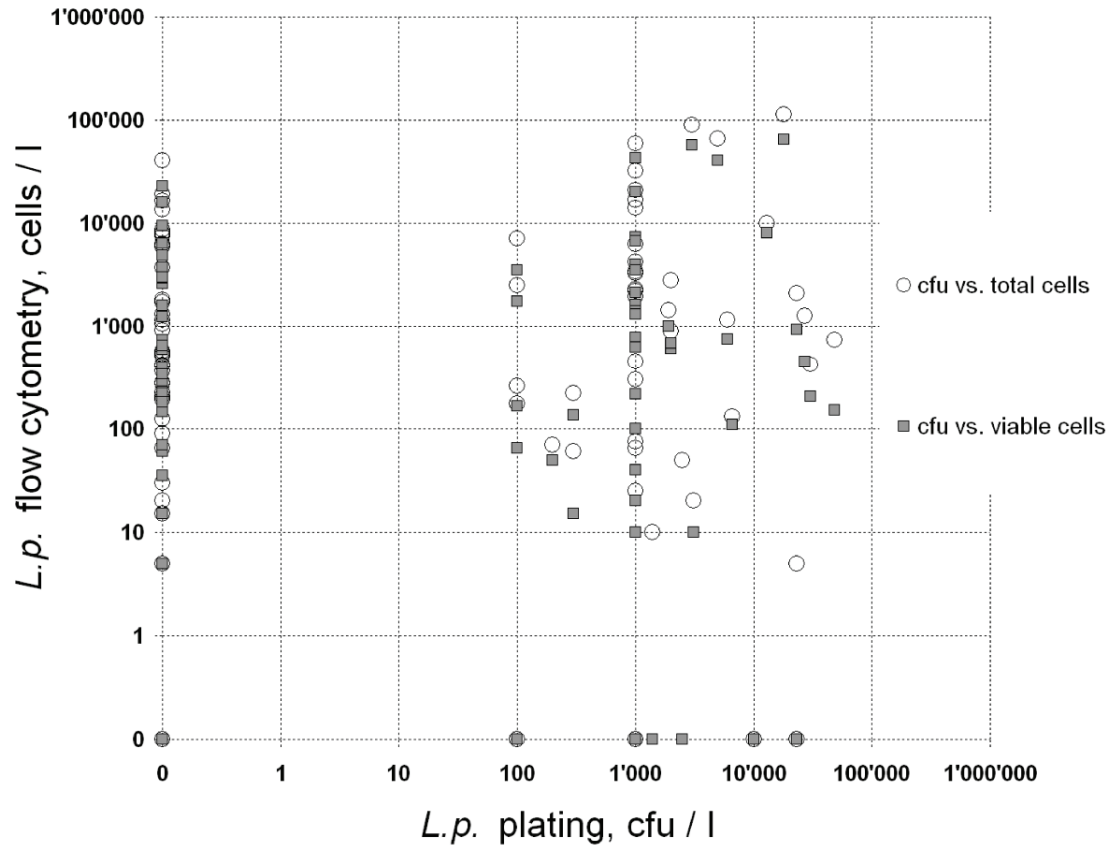

73

74 **Fig. S 7 Correlation of *Lp* plating versus Flow cytometry for total and viable**

75 ***Lp*.**

76

77

78

79

80

81



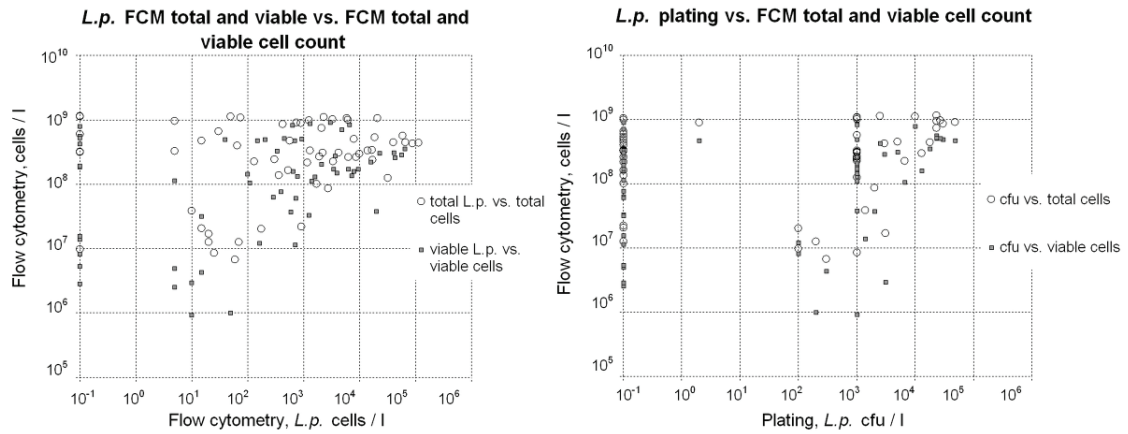

82

83 **Fig. S 8 Correlations of *Lp* detection by FCM and plating versus total and**  
 84 **viable cell count (TCC, VCC).** Left plot shows FCM total and viable *Lp* versus  
 85 TCC and VCC. Right plot shows *Lp* plating versus TCC and VCC.

86

87

88

89

90

91

92

93

94

95



**Table S 1 Value table of the spiking experiments calibration series (Fig. 3).** Recovery is displayed in percent  $\pm$  the root mean square deviation (RMSD), taking into account the error propagation from seeding to recovery.

| n                | Seeding Levels       |      |                      | Recovered Cells*     |      |                      | Recovery   |      |             |       |      |     |
|------------------|----------------------|------|----------------------|----------------------|------|----------------------|------------|------|-------------|-------|------|-----|
|                  | L.p. total           |      | L.p. viable          | L.p. total           |      | L.p. viable          | L.p. total |      | L.p. viable |       |      |     |
|                  | Value $\pm$ SD       | SD % | Value $\pm$ SD       | Value $\pm$ SD       | SD % | Value $\pm$ SD       | SD %       | %    | RMSD %      |       |      |     |
| 15               | 0                    | 0    | 0                    | 26.0 $\pm$ 8.0       | 30.6 | 8.0 $\pm$ 2.5        | 30.9       | -    | -           | -     |      |     |
| 3                | 41.7 $\pm$ 7.6       | 18.3 | 36.7 $\pm$ 7.6       | 32.3 $\pm$ 15.6      | 26.7 | 37.0 $\pm$ 5.4       | 11.9       | 77.6 | 53.7        | 100.9 |      |     |
| 3                | 421.7 $\pm$ 29.3     | 6.9  | 403.3 $\pm$ 28.4     | 377.3 $\pm$ 31.6     | 7.8  | 365.3 $\pm$ 18.0     | 4.8        | 89.5 | 11.4        | 90.6  |      |     |
| 3                | 1'920 $\pm$ 53       | 2.8  | 1'853 $\pm$ 76       | 1'792 $\pm$ 63       | 3.5  | 1'712 $\pm$ 13       | 0.7        | 93.4 | 4.6         | 92.4  |      |     |
| 3                | 4'147 $\pm$ 68       | 1.6  | 4'013 $\pm$ 45       | 3'792 $\pm$ 135      | 3.7  | 3'534 $\pm$ 74       | 2.1        | 91.5 | 4.0         | 88.0  |      |     |
| 3                | 50'512 $\pm$ 952     | 1.9  | 48'962 $\pm$ 579     | 38'062 $\pm$ 3'12    | 0.8  | 34'585 $\pm$ 1'084   | 3.1        | 75.4 | 2.6         | 70.6  |      |     |
| 3                | 450'167 $\pm$ 24'939 | 4.9  | 430'482 $\pm$ 16'017 | 382'199 $\pm$ 15'492 | 4.1  | 345'345 $\pm$ 10'081 | 2.9        | 84.9 | 7.0         | 80.2  |      |     |
| <b>Averages:</b> |                      |      |                      |                      |      |                      |            |      | 85.4        | 13.9  | 87.1 | 8.4 |

\*after subtracting the average background signals
